1  
2  
3  
4  
5  
6  
7  
8  
9  
10  
11  
12  
13  
14  
15  
16  
17  
18  
19  
20  
21

The neural representational space of social memory

Sarah L. Dziura and James C. Thompson  
George Mason University, Fairfax, VA, 22030 USA  
Corresponding author: [sdziura@masonlive.gmu.edu](mailto:sdziura@masonlive.gmu.edu)

Pages: 37

Figures: 5

Tables: 3

Abstract word number: 175

Introduction word number: 650

Discussion word number: 1384

22 Acknowledgments: This research was funded by Office of Naval Research Award  
23 N00014-10-1-0198.

24  
25 Conflict of Interest: The authors declare no competing financial interests.  
26

27  
28  
29  
30  
31  
32  
33  
34 Keywords: social networks, social cognition, learning, representational similarity  
35 analysis, fMRI, neuroimaging  
36  
37  
38  
39  
40

41 **Abstract:** Social functioning involves learning about the social networks in which we  
42 live and interact; knowing not just our friends, but also who is friends with our friends.  
43 Here we utilized a novel incidental learning paradigm and representational similarity  
44 analysis (RSA), a functional MRI multivariate pattern analysis technique, to examine the  
45 relationship between learning social networks and the brain's response to the faces  
46 within the networks. We found that accuracy of learning face pair relationships through  
47 observation is correlated with neural similarity patterns to those pairs in the left  
48 temporoparietal junction (TPJ), the left fusiform gyrus, and the subcallosal ventromedial  
49 prefrontal cortex (vmPFC), all areas previously implicated in social cognition. This  
50 model was also significant in portions of the cerebellum and thalamus. These results  
51 show that the similarity of neural patterns represent how accurately we understand the  
52 closeness of any two faces within a network, regardless of their true relationship. Our  
53 findings indicate that these areas of the brain not only process knowledge and  
54 understanding of others, but also support learning relations between individuals in  
55 groups.

56  
57 **Significance Statement:** Knowledge of the relationships between people is an  
58 important skill that helps us interact in a highly social world. While much is known about  
59 how the human brain represents the identity, goals, and intentions of others, less is  
60 known about how we represent knowledge about social relationships between others. In  
61 this study, we used functional neuroimaging to demonstrate that patterns in human  
62 brain activity represent memory for recently learned social connections.

63

64

65           Social relationships guide and support much of human behavior. Not only do we  
66 form strong lifelong family bonds, we also interact with others in work, education, and  
67 leisure settings and create lasting non-kin relationships. For many species, including  
68 humans, non-kin based social networks can have important consequences for health  
69 and fitness (Cheney, 2011; Tung et al., 2015). Benefits of social relationships can come  
70 both from direct connections (our friends) as well as second-order or indirect  
71 connections (friends of our friends) (Brent, 2015; Seyfarth & Cheney, 2015). A  
72 considerable amount of research has revealed the cognitive and neural mechanisms  
73 underlying the representation of social faces, voices, and bodies (Allison, Puce, &  
74 McCarthy, 2000; Arsenault & Buchsbaum, 2015). There is also a good understanding of  
75 the neural basis of social knowledge about other individuals (Koski, Xie, & Olson, 2015;  
76 Wang et al., 2017), how we represent ingroup versus outgroup members (Van Bavel &  
77 Cunningham, 2012; Shkurko, 2013), and how we represent the mental states of others  
78 (Contreras, Schirmer, Banaji, & Mitchell, 2013; Saxe & Kanwisher, 2003).

79           Less well understood is how we represent knowledge about indirect social  
80 connections. Memory for who knows whom is important for navigating social  
81 relationships, including knowing who to approach for information, support, and other  
82 resources. Individual differences in sociality have been linked to neural and behavioral  
83 measures of social perception (Baron-Cohen et al., 1999; Dziura & Thompson, 2014;  
84 Kanai, Bahrami, Roylance, & Rees, 2012), and there are differences in how well people  
85 can remember social networks (Brewer, 2000; Casciaro, 1998; Freeman, Romney, &  
86 Freeman, 1987). However, the underlying neural processes involved in learning  
87 complex social network relationships has not been thoroughly examined. Human social

88 organization is dynamic, as the composition of groups and the ties within them change  
89 over an individual's lifetime (Couzin, 2006). Prior literature indicates several brain areas  
90 likely to be important for representing information about social networks. Perception of  
91 changes in relationship ties and tie strength has been linked to activity in the bilateral  
92 posterior superior temporal sulcus (pSTS) and temporoparietal junction (TPJ) (Bault,  
93 Pelloux, Fahrenfort, Ridderinkhof, & Van Winden, 2015). Retrieval of social knowledge,  
94 including consideration of kin group cohesion, involves medial and lateral prefrontal  
95 cortex (mPFC; IPFC) (Rüsch et al., 2014; Satpute, Badre, & Ochsner, 2014). Learning  
96 and representing information about social hierarchy, an important component to many  
97 social networks, recruits amygdala, hippocampus, and ventral mPFC (Kumaran, Melo,  
98 & Duzel, 2012). A recent study by Parkinson and colleagues (2017) revealed that the  
99 similarity of local patterns of fMRI responses in ventral mPFC and IPFC, as well as  
100 lateral temporal cortex and TPJ, to viewing videos of individuals from participants' real  
101 world social network, conveyed information about network position of the members.  
102 These findings suggest that information about social network relationships is  
103 represented in patterns of fMRI responses associated with viewing individuals from  
104 one's network.

105 In this study, we examined the memory and neural representation of connections  
106 between members of two novel social networks, using fMRI and representational  
107 similarity analysis (RSA). Artificial networks were used in order to experimentally control  
108 the closeness of network members and assess the role of the memory for relationship  
109 strength in fMRI responses. We examined if the pattern similarity of fMRI responses to  
110 any two faces from a learned social network reflected the tie strength (closeness) of

111 those two individuals within the network: that is, does the similarity of the pattern of  
112 response to two network members increase as a function of the closeness of those  
113 members? We also examined if the memory for tie strength between network members  
114 was related to the similarity of the fMRI voxel pattern response to the faces of members.  
115 To understand the contribution of the frequency of face pairing during network learning  
116 to memory and neural representations, we compared a network in which centrality  
117 differed between members (i.e. some members had more connections than others) to a  
118 network with no individual centrality.

119

120

## Materials and Methods

### 121 Participants

122 22 healthy individuals (10 females; age range = 18-34; mean age = 23; ethnicity  
123 = 64% White, 18% Hispanic/Latino, 18% Asian) participated in a 1.5 hour learning  
124 session immediately followed by a 1.5 hour fMRI scanning session. Behavioral data  
125 from a total of 31 individuals was collected, but seven subjects did not meet the learning  
126 criteria from the behavioral task, one subject was unable to be scanned, and one  
127 subject's fMRI data was incomplete. All participants were right handed (self-reported)  
128 with normal or corrected-to-normal vision. Participants provided written informed  
129 consent in accordance with the Declaration of Helsinki and the Human Subjects Review  
130 Board at George Mason University and were compensated for their time.

131

### 132 Experimental Design and Statistical Analysis

### 133 Stimuli

134 Task stimuli consisted of 24 faces of varying ethnicities, equally divided by  
135 gender. Faces were all in color and facial expressions were all smiling. These stimuli  
136 were downloaded from the Park Aging Mind Laboratory Database at UT Dallas (Minear  
137 & Park, 2004) and were chosen to be as realistic to a college campus as possible,  
138 ensuring the perception of real people who might interact and be friends with each  
139 other.

140

### 141 **Task Design**

142 Participants completed a two-alternative forced choice task to become familiar  
143 with the structure of two six-person social networks (**Figure 1**). Pairs of faces  
144 represented connections within each network, with the frequency of pairing indicating  
145 relationship strength. Each network had an equal number of male and female faces of  
146 varying ethnicities. Network properties differed between the two in that although each  
147 network had an equal number of connections of each strength level, there were  
148 differences among the individual members (faces) in each network. The faces in  
149 network 1 had varying numbers of connections and therefore each had a different  
150 average closeness to the rest of the network, whereas the faces in network 2 had an  
151 equal number of connections and an equal average closeness to all other faces in the  
152 network. This meant that in network 1 the centrality of members was varied (variable-  
153 centrality network), while in network 2 centrality was equated across members (fixed-  
154 centrality network). This also meant that the frequency of presentation of each face  
155 differed in network 1, but was equivalent in network 2. Each trial consisted of a face pair  
156 presented for 4 seconds accompanied by a question, and participants were asked to

157 make a comparison between the faces and decide which person better fit the question.  
158 Questions consisted of behavioral and personality characteristics taken from various  
159 personality surveys included in the International Personality Item Pool  
160 (<http://ipip.ori.org/>). Half of the questions asked which person was more likely to exhibit  
161 a characteristic, and half asked which person was less likely (example: “Who is more  
162 likely to be easily intimidated?”). Network learning took place in alternating blocks,  
163 where the subjects viewed 36 randomly presented trials of one network followed by 36  
164 trials of the second network. Participants completed 720 trials in total (360 per network),  
165 with the weakest network connections being presented a total of 20 times and the  
166 strongest a total of 80 times.

167       After completing the paired face viewing portion, participants were explicitly  
168 tested on their knowledge of the network connections. They were told that the faces  
169 represented college students living in a dorm together, the faces that they saw paired  
170 together previously represented friend connections, and the more often they were  
171 presented together, the closer in friendship the pair was. They were asked to group all  
172 of the faces into two separate halls, as a check to make sure that they could distinguish  
173 between the faces in different networks. They were then presented with all possible  
174 within-network face pairs twice and asked to rate their relationship on a scale of 0 (do  
175 not know each other) to 4 (know each other very well). They were not asked about  
176 cross-network face relationships. This explicit testing period was included to ensure that  
177 participants learned the structure of the networks to an appropriate level before being  
178 scanned. Participants who were within 2 standard deviations of pilot data (hit rate =  
179 0.85, SD = 0.14; false alarm rate = 0.35, SD = 0.15) were included in further analysis.

180 Both parts of the behavioral task (learning and recall) were presented to the participant  
181 using PsychoPy version 1.842 software (<http://www.psychopy.org/>).

182 The fMRI task stimuli included the same 12 faces from the behavioral task as  
183 well as 12 novel faces as a control. Faces were presented one at a time for one second  
184 on a black background with a 4.5 second inter-stimulus interval (black screen with a  
185 white fixation dot), and participants completed a 1-back task to ensure they were  
186 attentive. The task consisted of four runs of 9.6 minutes each, resulting in each face  
187 being presented a total of 16 times (not counting repeats, which were included in  
188 analysis as a separate regressor). Following the face task, participants underwent an  
189 unrelated dynamic localizer session. Localizer stimuli consisted of 18 second blocks  
190 each of faces, body parts, outdoor scenes, moving objects, and scrambled objects. The  
191 fMRI experiment was presented to the participant using Neurobehavioral Systems  
192 Presentation version 16.3 (<https://www.neurobs.com>).

193

#### 194 **fMRI data acquisition, preprocessing, and analysis**

195 fMRI data were collected with a Siemens Allegra 3T scanner and a quadrature  
196 birdcage head coil at the Department of Psychology at George Mason University. Visual  
197 stimuli were displayed on a rear projection screen and viewed by participants on a head  
198 coil-mounted mirror. Blood oxygenation level dependent (BOLD) data were acquired  
199 using gradient-echo, echoplanar imaging scans: 40 axial slices (3-mm slice thickness),  
200 repetition time (TR)/echo time (TE) = 2350/30 ms, flip angle = 70, 64 x 64 matrix, field of  
201 view = 192 mm. 245 volumes were collected in each run. At the end of the fMRI  
202 scanning session, one T1 whole-head anatomical structural scan was acquired using a



203 three-dimensional, magnetization-prepared, rapid-acquisition gradient echo (MPRAGE)  
204 pulse sequence. The following parameters were used for these scans: 160 1-mm slices,  
205 256 x 256 matrix, field of view = 260 mm, TR/TE = 2300/3.37 ms. Functional data were  
206 analyzed using FSL (version 5.0.8) fMRI Expert Analysis Tool ([fsl.fmrib.ox.ac.uk](http://fsl.fmrib.ox.ac.uk)) and  
207 Matlab (version R2012a) software (<http://www.mathworks.com>). Preprocessing included  
208 brain extraction, high-pass filtering at 96 s, slice-timing correction, motion correction,  
209 and smoothing with a 6 mm FWHM kernel. Runs with > 1 mm of motion were run  
210 through the BrainWavelet Despiking program in Matlab (Patel et al., 2014). For first-  
211 level analysis, linear regression was conducted at each voxel, using generalized least  
212 squares with a voxel-wise, temporally and spatially regularized autocorrelation model,  
213 drift fit with Gaussian-weighted running line smoother. For second-level analysis, linear  
214 regression was conducted at each voxel, using ordinary least squares.

215

### 216 **Regions of Interest (ROI) and Mask Creation**

217 Localizer data preprocessing steps were identical except the functional data was  
218 registered only to each subject's specific structural image. Face-selective regions of  
219 interest (ROIs) were created from subtracting the combined object, scrambled object,  
220 and scene conditions from the face condition. These regions included bilateral posterior  
221 STS and fusiform face area (FFA). Activity was thresholded at  $Z > 3.7$  ( $p < 0.0001$ ) for  
222 most ROIs, although this threshold was relaxed to  $Z > 3$  ( $p < 0.001$ ) in one subject,  $Z >$   
223  $2.3$  ( $p < 0.01$ ) in four subjects, and  $Z > 1.65$  ( $p < 0.05$ ) in three subjects because of  
224 lower overall BOLD activity. These masks were projected back into native functional  
225 space for further analysis. Finally, an anatomical mask of areas involved in memory for

226 faces (encompassing the bilateral pSTS, extrastriate body area (EBA), ventral  
227 temporal/fusiform gyrus, precuneus/posterior cingulate cortex (PC/PCC), and  
228 hippocampus) was created from the Harvard-Oxford Cortical Structural Atlas in FSL.

229

### 230 **Univariate Analysis**

231 Each subject's functional data was registered to his or her anatomical scan and  
232 then registered to the MNI standard template. The regressors used in the generalized  
233 linear modeling (GLM) analysis were Network 1 v. rest, Network 2 v. rest, Control v.  
234 rest, and Response Trials v. rest. Contrasts used were Network 1 v. Control, Network 2  
235 v. Control, Both Networks v. Control, Control v. Both Networks, Network 1 v. Network 2,  
236 and Network 2 v. Network 1. Group nonparametric 1-sample (conditions v. rest) and 2-  
237 sample (condition A v. condition B) t-tests (5000 permutations) including threshold-free  
238 cluster enhancement and variance smoothing of 8 mm were conducted with  
239 `fslrandomise` within the mask created from anatomically-defined regions selective for  
240 face processing and memory.

241

### 242 **Representational Similarity Analysis**

243 Representational similarity analysis (RSA) is a form of multivariate pattern  
244 analysis that compares the distance between stimuli in neural representational space  
245 (Kriegeskorte, Mur, & Bandettini, 2008), and correlates this neural information with  
246 external patterns of information. In this way it can be utilized to assess different models  
247 or patterns of cognition above and beyond univariate analysis, or even more traditional  
248 multivariate pattern classification techniques (Haxby, Connolly, & Guntupalli, 2014). For

249 initial analysis of task data, no registration to structural or functional data was carried  
250 out, and the smoothing kernel used was 4 mm FWHM. All other preprocessing  
251 parameters mirrored the univariate whole-brain analysis. The GLM included separate  
252 regressors for each of the 24 faces and repeats. Resulting z-statistics were grouped by  
253 network for further analysis. Four separate dissimilarity matrices (DMs) were created for  
254 each network (for examples, see **Figure 5**): true network structure (created from tie  
255 strength), perception of network structure (taken from each subject's behavioral recall  
256 data after learning the networks), group average of perceived structure (where each  
257 face pair's perceived strength was averaged across subjects), and recall accuracy  
258 (measured by calculating the absolute distance between the true strength of each face  
259 pair and the average strength of the pair reported in the recall phase). The  
260 CoSMoMVA toolbox in Matlab was used for RSA calculations (Oosterhof, Connolly, &  
261 Haxby, 2016).

262 Separate whole-brain searchlights using Spearman correlations (size = 50  
263 voxels) were conducted on the average z-statistics for the faces within each network for  
264 each DM. The ensuing correlation maps were transformed into standard space for  
265 group analysis. No significant group differences were found across the two networks (in  
266 group nonparametric paired-sample t-tests with 5000 permutations), so the correlation  
267 maps in individual subject space were then averaged across networks within subjects  
268 and transformed again to standard space for across-network group analysis. Group  
269 nonparametric 1-sample t-tests (5000 permutations) including threshold-free cluster  
270 enhancement and variance smoothing of 8 mm were conducted with `fslrandomise`.  
271 Resulting t-statistic maps were visualized in the MNI volume as well as transformed to

272 the PALS-B12 standard atlas in Caret (<http://www.nitrc.org/projects/caret/>) for surface  
273 data visualization (Van Essen, 2005). RSA was also carried out within each localizer-  
274 defined ROI and the resulting correlations within each region were averaged across  
275 subjects.

276

277

## Results

278

### Behavioral task

279

280

281

282

283

284

285

286

287

288

289

290

291

292

293

294

Participants became familiar with the structure of two six-person social networks by viewing two faces presented simultaneously (**See Figure 1**). A paired set of faces represented a connection within the network, with the frequency of pairing indicating relationship strength. Analysis of social network recall data was conducted in Microsoft Excel (version 2016) and R Version 3.3.2 (<https://www.r-project.org/>). Subjects correctly identified relationship ties significantly greater than chance across both networks ( $t(21) = 8.08$ ,  $p = 7.004e-08$ ). **Table 1** shows the average hit rate, false alarm rate, sensitivity ( $d'$ ), and the correlation between true and reported perceived strength for ties and relationship strength across subjects. Paired sample two-tailed t-tests revealed no significant differences between recall measures for the two networks. There were also no significant age or gender effects for any of the measures. When averaged together across subjects, group perceived relationship strength was highly correlated with the true network structure ( $r = 0.896$ ,  $p < 0.00001$ ). In order to assess whether our behavioral task was comparable to previous forms of social network learning and recall, we calculated performance measures used by Brashears (2013). Accuracy refers to the number of ties correctly recalled divided by the number of total ties reported, coverage

295 refers to the number of ties correctly recalled divided by the total tie number in the  
296 network, and performance refers to the product of accuracy and coverage. T-tests  
297 revealed no significant differences between accuracy or performance measures in our  
298 task and those of Brashears (accuracy:  $t(21) = 0.98$ ,  $p = 0.34$ ; performance:  $t(21) =$   
299  $0.58$ ,  $p = 0.56$ ), and we actually saw an increase in coverage ( $t(21) = 3.58$ ,  $p = 0.002$ ),  
300 although our networks were smaller, so participants did not need to remember as many  
301 ties.

302         When exploring network recall, it is important to not only look at the correctly  
303 identified ties, but also at the pattern of mistakes made. Specifically, we wanted to see  
304 whether there are systematic biases that could be predicted by the level of relationship  
305 strength of the friend pairs. We assessed recall by relationship strength by looking at  
306 the relative direction of the errors made (i.e. how much subjects overestimated or  
307 underestimated the strength of the connection). A linear mixed effects regression model  
308 (fixed effect = strength; random effects = subject, residual) revealed that relationship  
309 strength affected recall error compared to a null model ( $\chi^2(1) = 226.9$ ,  $p < 2.2e-16$ ). This  
310 pattern shows that overall, weak ties were reported to be stronger than they actually  
311 were whereas strong ties were reported to be less strong (**Figure 2a**). This reflects a  
312 general tendency to assume a mid-level relationship between observed people when  
313 the relationship is not explicitly known or is unable to be recalled. This central tendency  
314 effect seems to be robust, as it was also observed in a separate subject sample ( $N =$   
315  $23$ ,  $17$  females, mean age =  $19.6$  ( $sd = 2.4$ )) learning a larger social network ( $N = 9$ ) and  
316 a larger possible range of relationship tie strengths to choose from ( $0-6$ ) ( $\chi^2(1) = 362.84$ ,  
317  $p < 2.2e-16$ ) (**Figure 2b**). In order to be able to compare network memory performance

318 to the neural patterns in response to each face in the network, we converted the relative  
319 error for each subject to absolute error, which gives a measure of distance from the true  
320 network structure, regardless of the direction of that error. The absolute error measure  
321 for each subject for each network was then used as a dissimilarity model for RSA to  
322 elucidate what neural patterns underlie these errors.

323

### 324 **fMRI Results**

325 During fMRI scanning, participants viewed the original faces from the social  
326 network behavioral session, as well as 12 novel faces and were asked to press a button  
327 when they saw a face repeated to guarantee attention. We first conducted a GLM  
328 comparing the 12 familiar faces from the two networks to unfamiliar control faces.  
329 **Figure 3** shows that an area of the left fusiform gyrus was more active when viewing  
330 unfamiliar faces, whereas the posterior cingulate gyrus/precuneus was more active  
331 when viewing familiar faces ( $p < 0.05$ , FWE-corrected with threshold-free cluster  
332 enhancement within an anatomical mask composed of areas previously shown to be  
333 relevant for face perception and memory; see **Table 2** for cluster information). While  
334 perception for different categories of faces is highly dependent on task demands, our  
335 findings are consistent with some previous literature examining recognition of familiar  
336 faces (Natu & O'Toole, 2011). The fusiform gyrus has been shown to activate  
337 significantly less to famous faces than to strangers in the left hemisphere (Gobbini,  
338 Leibenluft, Santiago, & Haxby, 2004), and the posterior cingulate/precuneus area is  
339 consistently activated more to personally familiar faces when compared to strangers  
340 (Gobbini et al., 2004; Pierce, Haist, Sedaghat, & Courchesne, 2004; Sugiura et al.,

341 2001). There were no univariate differences between responses to faces across the two  
342 networks.

343

### 344 **Representational Similarity Analysis**

345 To examine whether information related to social network recall is represented in  
346 the brain, we carried out RSA searchlight analysis on several DMs representing  
347 different types of information about the networks. The first compared neural pattern  
348 similarity to social tie strength, with more similar neural responses to any pair of faces  
349 representing a closer relationship between those faces. Neural pattern similarity that  
350 reflects this network structure would indicate that the brain carries information about the  
351 true relationship between individuals, regardless of whether people recall those  
352 relationships accurately. We did not find a significant correlation between these  
353 measures in our analyses. As the network properties differed between network 1 and 2  
354 (see Methods section for details), we compared the two networks and found no  
355 significant differences.

356 While the pattern similarity to viewing faces was not significantly associated with  
357 social tie strength, it was significantly associated with the subjects' memory for that tie  
358 strength. We assessed this by measuring each subject's absolute distance from each  
359 true network structure and the 1-correlation distance between the neural response to  
360 each face viewed in the scanner. An association between these two measures would  
361 indicate that the more accurately a subject perceives the true relationship tie strength  
362 between a pair of faces, the more similar their neural pattern response is to those two  
363 faces. In other words, this association does not rely on the actual connection strength of

364 the relationships themselves, but the subject's memory of that connection, reflecting a  
365 second-order knowledge or understanding of a social relationship. Neural pattern  
366 similarity in the left TPJ, the left fusiform gyrus, the subcallosal cingulate cortex, the  
367 cerebellum, the left thalamus, and a small portion of the left lateral occipital lobe was  
368 significantly correlated with the recall accuracy model, suggesting that neural  
369 populations within these areas are important for accurate perception of social  
370 relationship strength (**Figure 4**). **Table 3** reports MNI coordinates, cluster size, and  
371 peak voxel activity of results. As with tie strength similarity, we compared the two  
372 networks to each other separately and found no significant differences. This indicates  
373 that the significant findings are not due simply to frequency of the face pairs being  
374 presented, as this differed between the two networks.

375 We also conducted RSA searchlights using two other dissimilarity matrix models:  
376 recalled structure as measured by behavioral judgments, and the group average of  
377 those behavioral judgments (**Figure 5**). Neural pattern similarity that reflects behavioral  
378 recall would indicate that the brain carries information about an individual's perception  
379 of relationships, regardless of how accurate those perceptions are. This perceived  
380 structure at the group average level can show general trends in how relationships are  
381 viewed by groups. However, neither model reached significance in the whole-brain  
382 searchlight analysis. Finally, we utilized a separate functional localizer to create regions  
383 of interest selective for face processing in the STS and fusiform gyrus, and conducted  
384 RSA correlations across each ROI for every subject. No selected regions yielded  
385 significant results.

386



387

## Discussion

388

389

390

391

392

393

394

395

396

397

398

399

400

401

402

403

404

In this study, we used fMRI and RSA to examine the neural representational space of friendship connections of members of a social network. Indirect connections (i.e., the friends of our friends) play an important role in assessing our own place in our social world. This could include knowledge about social hierarchy which may affect how we act around different network members, or knowledge about which people are more well-connected and might therefore be better to approach for acquiring resources. We examined if the strength of ties between pairs of network members was represented in human brain via the similarity of fMRI responses associated with viewing the faces of those members. We did not find support for this proposal. Instead, our results show that several brain regions, including the TPJ, subcallosal vmPFC, fusiform gyrus, cerebellum, and thalamus, represent memory or knowledge about tie strength, rather than tie strength itself, in the similarity of neural patterns between face pairs. That is, these areas code memory for relationship strength regardless of what that connection is, or even whether there is a connection at all, within a social network. The more accurately a participant recalled the tie strength for a pair of faces (regardless of the closeness of ties), the more similar the pattern of fMRI responses was to viewing those two faces.

405

406

407

408

409

Our results indicated that the relationship between memory for tie strength and neural pattern similarity was not due to factors such as the frequency at which different faces were paired with others during the learning of the network, as we found no differences in memory performance or RSA results between a network in which some faces were paired more often with others (variable-centrality network) and one in which

410 all faces had the same number of connections to other network members (fixed-  
411 centrality network). In addition, participants saw each individual face the same number  
412 of times as they learned one of the two networks and there were no significant  
413 behavioral or neural differences between the two networks, and therefore our results  
414 are not driven by the familiarity of one face over any other. Instead, our results indicate  
415 that information about pairs of network members, such as how close they are, is coded  
416 in TPJ and vmPFC via the similarity of neural responses.

417 Both the TPJ and vmPFC have been consistently linked with complex facets of  
418 social understanding, such as tracking the popularity of real-world social network  
419 members (Zerubavel, Bearman, Weber, & Ochsner, 2015). The TPJ, dorsomedial PFC,  
420 and ventrolateral PFC are engaged when participants recall different facets of socially  
421 relevant knowledge (Satpute et al., 2014). The left TPJ is selectively modulated by  
422 vasopressin, a neuropeptide linked to a number of complex social behaviors, during  
423 social recognition (Zink et al., 2011) and lesions to the left TPJ lead to specific deficits in  
424 social reasoning (Samson, Apperly, Chiavarino, & Humphreys, 2004). The vmPFC  
425 shows increased activation when thinking about friends compared to kin (Wlodarski &  
426 Dunbar, 2016), and the subgenual cingulate cortex is involved in tracking individual  
427 differences in perceptions of cohesiveness in kin groups (Rüsch et al., 2014). Our  
428 findings are in line with this previous literature showing the importance of these areas in  
429 forming and maintaining social relationships. They further indicate that these areas are  
430 not only important in the knowledge and understanding of other individuals, but they  
431 also support learning relations between individuals in groups. The fusiform gyrus is also  
432 heavily involved in social perception, particularly in response to face stimuli (Kanwisher,

433 McDermott, & Chun, 1997). While early models of face perception suggested a strict  
434 feed-forward mechanism for distinguishing, identifying, and gaining socially-relevant  
435 information from faces, recent proposals indicate a more interactive process between  
436 different neural regions when engaging in higher-order social face perception (Atkinson  
437 & Adolphs, 2011). Our data indicates that patches of the fusiform gyrus do not simply  
438 perceive and distinguish facial features (from each other as well as non-face stimuli),  
439 but are also involved in learning more abstract social relationships between faces.

440         A large meta-analysis of fMRI studies has revealed that areas of the cerebellum  
441 are activated in several features of social cognition, with increases in activity occurring  
442 with increasing social abstraction levels in the cognitive tasks (Overwalle, Baetens,  
443 Marien, & Vandekerckhove, 2014). The authors suggest this cerebellar activity is due to  
444 a general increase in cognitive task demands, in line with the theory of the cerebellum  
445 as a cognitive process modulator (Andreasen & Pierson, 2008). Our finding that the  
446 cerebellum is involved in accurate knowledge of abstract learned relationships between  
447 others is consistent with this. Furthermore, we found that the thalamus is also involved  
448 in this process. The thalamus has a large number of connections to other areas of the  
449 brain, and has been shown to have specific emotional and socially-relevant associations  
450 (Christoffel et al., 2015; Feng et al., 2016; Ioannidis et al., 2013). It also has high  
451 functional connectivity to the hippocampus (Stein et al., 2000), and may be a critical link  
452 in the formation of episodic memories, regardless of the sociality of those memories  
453 (Aggleton et al., 2010).

454         The findings of the present study complement a recent paper by Parkinson and  
455 colleagues (2017), who reported that neural pattern similarity in ventral mPFC and

456 IPFC, TPJ and lateral temporal cortex, as well as other regions, to viewing videos of  
457 individuals from a participants' social network was associated with network  
458 characteristics of those viewed, including centrality within the network, social distance  
459 from the participant, and the 'brokerage' of an individual (the extent to which they  
460 connected other, low contact network members to others in the network). Parkinson and  
461 colleagues took advantage of the one, real-world social network in which all of the  
462 participants and those who were used as stimuli were embedded. In contrast, we used  
463 an artificial social network in which all network members were initially unfamiliar to the  
464 participants, and thus only examined relationships between the network members, and  
465 not those between network members and our participants. Together, the more  
466 naturalistic, field-work informed approach of Parkinson and colleagues and the  
467 laboratory-based approach of as ours, in which factors such as familiarity and the  
468 statistics of connections were experimentally controlled, both reveal that social network  
469 information is represented in brain regions implicated in social cognition through the  
470 similarity of local patterns of neural responses to viewing individual network members.

471 While most of our subjects were able to accurately report relationship ties, there  
472 were individual differences between ability to recall relationship strength (measured by  
473 the correlation between the true structure and the reported structure of the networks).  
474 Previous literature does indicate that there are individual differences in social recall.  
475 Individuals tend to report group and relationship averages or norms more accurately  
476 than individual interactions, but more experienced observers show more accurate recall,  
477 especially when group structure is transitive (Freeman & Romney, 1987; Freeman,  
478 1992; Kumbasar, Romney, & Batchelder, 1994). It has been suggested that humans

479 use cognitive heuristics such as triadic closure in order to remember social ties (De  
480 Soto, 1960; Freeman, 1992; Brashears, 2013; Brashears & Quintaine, 2015).  
481 Overestimation of symmetric ties for less central network members, and  
482 underestimation of more central network members, has also been reported previously  
483 (Krackhardt, 1987). There are also differences in the ability to perceive and remember  
484 non-social patterns, but evidence suggests that learning, remembering, and storing  
485 social information might be distinct from traditional learning and memory systems  
486 (Okuyama, Kitamura, Roy, Itohara, & Tonegawa, 2016; Meyer, Taylor, & Lieberman,  
487 2015; Tandler & Wagner, 2015). Further experiments could explore this type of task  
488 explicitly, as prior social network learning studies informed participants that they would  
489 be tested on connections (Brashears, 2013; De Soto, 1960).

490         The way in which people learn and remember social connections between  
491 individuals in groups has a considerable impact on everyday life. We are not only able  
492 to perceive and understand the social signals of other individuals, but we can also  
493 perceive and understand information about social connections or relationships in which  
494 we are not directly involved. Our results show that representations of these indirect  
495 connections are coded in the pattern of neural responses associated with viewing  
496 related individuals. This is a critically important skill because the accuracy with which we  
497 perceive and remember subtle connections and relationships seen in our surroundings  
498 helps us move more freely and easily in our highly social world.

499

500

501

502

## References

503 Aggleton, J. P., O'Mara, S. M., Vann, S. D., Wright, N. F., Tsanov, M., & Erichsen, J. T.

504 (2010). Hippocampal-anterior thalamic pathways for memory: Uncovering a

505 network of direct and indirect actions. *The European Journal of Neuroscience*,

506 *31*, 2292-2307. doi: 10.1111/j.1460-9568.2010.07251.x.

507 Allison, T., Puce, A., & McCarthy, G. (2000). Social perception from visual cues: Role of

508 the STS region. *Trends in Cognitive Sciences*, *4*, 267-278. doi:

509 [https://doi.org/10.1016/S1364-6613\(00\)01501-1](https://doi.org/10.1016/S1364-6613(00)01501-1).

510 Andreasen, N. C. & Pierson, R. (2008). The role of the cerebellum in schizophrenia.

511 *Biological Psychiatry*, *64*, 81-88. doi: 10.1016/j.biopsych.2008.01.003.

512 Arsenault, J. S. & Buchsbaum, B. R. (2015). Distributed neural representations of

513 phonological features during speech perception. *The Journal of Neuroscience*,

514 *35*, 634-642. doi:10.1523/JNEUROSCI.2454-14.2015

515 Atkinson, A. P. & Adolphs, R. (2011). The neuropsychology of face perception: beyond

516 simple dissociations and functional selectivity. *Philosophical Transactions of the*

517 *Royal Society B*, *366*, 1726-1738. doi: 10.1098/rstb.2010.0349.

518 Baron-Cohen, S., Ring, H.A., Wheelwright, S., Bullmore, E.T., Brammer, M.J.,

519 Simmons, A., & Williams, S.C.R. (1999). Social intelligence in the normal and

520 autistic brain: An fMRI study. *European Journal of Neuroscience*, *11*, 1891-1898.

521 doi: 10.1046/j.1460-9568.1999.00621.x.

522 Bault, N., Pelloux, B., Fahrenfort, J. J., Ridderinkhof, K. R., & van Winden, F. (2015).

523 Neural dynamics of social tie formation in economic decision-making. *Social*

524 *Cognitive and Affective Neuroscience*, *10*, 877-884. doi: 10.1093/scan/nsu138.

- 525 Brashears, M. E. (2013). Humans use compression heuristics to improve the recall of  
526 social networks. *Scientific Reports*, 3, 1- 7. doi: 10.1038/srep01513.
- 527 Brashears, M. E. & Quintaine, E. (2015). The microstructures of network recall: How  
528 social networks are encoded and represented in human memory. *Social*  
529 *Networks*, 41, 113-126. doi: 10.1016/j.socnet.2014.11.00.
- 530 Brent, L. J. (2015). Friends of friends: Are indirect connections in social networks  
531 important to animal behavior? *Animal Behaviour*, 103, 211-222. doi:  
532 10.1016/j.anbehav.2015.01.020.
- 533 Brewer, D. D. (2000). Forgetting in the recall-based elicitation of personal and social  
534 networks. *Social Networks*, 22, 29-43. doi: 10.1016/S0378-8733(99)00017-9.
- 535 Casciaro, T. (1998). Seeing things clearly: Social structure, personality, and accuracy in  
536 social network perception. *Social Networks*, 20, 331-351. doi: 10.1016/S0378-  
537 8733(98)00008-2.
- 538 Cheney, D. L. (2011). Extent and limits of cooperation in animals. *Proceedings of the*  
539 *National Academy of Sciences*, 108, 10902-10909. doi:  
540 10.1073/pnas.1100291108
- 541 Christoffel, D. J., Golden, S. A., Walsh, J. J., Guise, K. G., Heshmati, M., Friedman, A.  
542 K., Dey, A., Smith, M., Rebusi, N., Pfau, M., Ables, J. L., Aleyasin, H., Khibnik, L.  
543 A., Hodes, G. E., Ben-Dor, G. A., Deisseroth, K., Shapiro, M. L., Malenka, R. C.,  
544 Ibanez-Tallon, I., Han, M. H., & Russo, S. J. (2015). Excitatory transmission at  
545 thalamo-striatal synapses mediates susceptibility to social stress. *Nature*  
546 *Neuroscience*, 18, 962-964. doi: 10.1038/nn.4034.

- 547 Contreras, J. M., Schirmer, J., Banaji, M. R., & Mitchell, J. P. (2013). Common brain  
548 regions with distinct patterns of neural responses during mentalizing about  
549 groups and individuals. *Journal of Cognitive Neuroscience*, *25*, 1406-1417.
- 550 Couzin, I. D. (2006). Behavioural ecology: Social organization in fission-fusion societies.  
551 *Current Biology*, *16*, R169-171. doi: 10.1016/j.cub.2006.02.042.
- 552 De Soto, C. B. (1960). Learning a social structure. *Journal of Abnormal and Social*  
553 *Psychology*, *60*, 417-421. doi: 10.1037/h0047511.
- 554 Dziura, S. L. & Thompson, J. C. (2014). Social-network complexity in humans is  
555 associated with the neural response to social information. *Psychological Science*,  
556 *25*, 2095-2101. doi: 10.1177/0956797614549209.
- 557 Feng, C., Li, Z., Feng, X., Wang, L., Tian, T., & Luo Y. J. (2016). Social hierarchy  
558 modulates neural responses of empathy for pain. *Social Cognitive and Affective*  
559 *Neuroscience*, *11*, 485-495. doi: 10.1093/scan/nsv135.
- 560 Freeman, L. C. & Romney, A.K. (1987). Words, deeds and social structure: A  
561 preliminary study of the reliability of informants. *Human Organization*, *46*, 330-  
562 334. doi: 10.17730/humo.46.4.u122402864140315.
- 563 Freeman, L. C., Romney, A. K., & Freeman, S. C. (1987). Cognitive structure and  
564 informant accuracy. *American Anthropologist*, *89*, 310-325. doi:  
565 10.1525/aa.1987.89.2.02a00020.
- 566 Freeman, L. C. (1992). Filling in the blanks: A theory of cognitive categories and the  
567 structure of social affiliation. *Social Psychology Quarterly*, *55*, 118-127. doi:  
568 10.2307/2786941.



- 569 Gobbini, M. I., Leibenluft, E., Santiago, N., & Haxby, J. V. (2004). Social and emotional  
570 attachment in the neural representation of faces. *NeuroImage* 22, 1628-1635.  
571 doi: 10.1016/j.neuroimage.2004.03.049.
- 572 Haxby, J.V., Connolly, A.C., & Guntupalli, J.S. (2014). Decoding neural representational  
573 spaces using multivariate pattern analysis. *Annual Reviews of Neuroscience*, 37,  
574 435-456. doi: 10.1146/annurev-neuro-062012-170325.
- 575 Ioannidis, A. E., Kimiskidis, V. K., Loukopoulou, E., Geroukis, T., Vlaikidis, N., &  
576 Kosmidis, M. H. (2013). Apathy, cognitive dysfunction and impaired social  
577 cognition in a patient with bilateral thalamic infarction. *Neurocase*, 19, 513-520.  
578 doi: 10.1080/13554794.2012.701645.
- 579 Kanai, R., Bahrami, B., Roylance, R., & Rees, G. (2012). Online social network size is  
580 reflected in human brain structure. *Proceedings of the Royal Society B: Biological*  
581 *Sciences*, 279, 1327–1334. doi: 10.1098/rspb.2011.1959.
- 582 Kanwisher, N., McDermott, J., & Chun, M. M. (1997). The fusiform face area: A module  
583 in human extrastriate cortex specialized for face perception. *The Journal of*  
584 *Neuroscience*, 17, 4302-4311. doi: 10.3410/f.717989828.793472998.
- 585 Koski, J., Xie, H., & Olson, I. R. (2015). Understanding social hierarchies: The neural  
586 and psychological foundations of status perception. *Social Neuroscience*, 10,  
587 527-550. doi: 10.1080/17470919.2015.1013223.
- 588 Krackhardt, D. (1987). Cognitive social structures. *Social Networks*, 9, 109-134. doi:  
589 10.1016/0378-8733(87)90009-8.

- 590 Kriegeskorte, N., Mur, M., & Bandettini, P. (2008). Representational similarity analysis –  
591 connecting the branches of systems neuroscience. *Frontiers in Systems*  
592 *Neuroscience*, 2, 1-28. doi: 10.3389/neuro.06.004.2008.
- 593 Kumaran, D., Melo, H. L., & Duzel, E. (2012). The emergence and representation of  
594 knowledge about social and nonsocial hierarchies. *Neuron*, 76, 653-666. doi:  
595 10.1016/j.neuron.2012.09.035.
- 596 Kumbasar, E., Romney, A. K., & Batchelder, W. H. (1994). Systematic biases in social  
597 perception. *American Journal of Sociology*, 100, 477-505. doi: 10.1086/230544.
- 598 Meyer, M. L., Taylor, S. E., & Lieberman, M. D. (2015). Social working memory and its  
599 distinctive link to social cognitive ability: An fMRI study. *Social Cognitive and*  
600 *Affective Neuroscience*, 10, 1338-1347. doi: 10.1093/scan/nsv065.
- 601 Minear, M. & Park, D. C. (2004). A lifespan database of adult facial stimuli. *Behavior*  
602 *Research Methods, Instruments, & Computers*. 36, 630-633. doi:  
603 10.3758/BF03206543.
- 604 Natu, V. & O'Toole, A. J. (2011). The neural processing of familiar and unfamiliar faces:  
605 A review and synopsis. *British Journal of Psychology*, 102, 726-747. doi:  
606 10.1111/j.2044-8295.2011.02053.x.
- 607 Okuyama, T., Kitamura, T., Roy, D. S., Itohara, S., & Tonegawa, S. (2016). Ventral CA1  
608 neurons store social memory. *Science*, 353, 1536-1541. doi:  
609 10.1126/science.aaf7003.
- 610 Oosterhof, N. N., Connolly, A. C., and Haxby, J. V. (2016). CoSMoMVPA: Multi-modal  
611 multivariate pattern analysis of neuroimaging data in Matlab / GNU Octave.  
612 *Frontiers in Neuroinformatics*, 10, 1-27. doi: 10.3389/fninf.2016.00027.

- 613 Overwalle, F. V., Baetens, K., Marien, P., & Vandekerckhove, M. (2014). Social  
614 cognition and the cerebellum: A meta-analysis of over 350 fMRI studies.  
615 *NeuroImage*, 86, 554-572. doi: 10.1016/j.neuroimage.2013.09.033.
- 616 Parkinson, C., Kleinbaum, A. M., & Wheatley, T. (2017). Spontaneous neural encoding  
617 of social network position. *Nature Human Behaviour*, 1, 1-7.
- 618 Patel, A. X., Kundu, P., Rubinov, M., Jones, P. S., Vértes, P. E., Ersche, K. D.,  
619 Suckling, J., & Bullmore, E. T. (2014). A wavelet method for modeling and  
620 despiking motion artifacts from resting-state fMRI time series. *NeuroImage*, 95,  
621 287-304. doi: 10.1016/j.neuroimage.2014.03.012.
- 622 Pierce, K., Haist, F., Sedaghat, F., & Courchesne, E. (2004). The brain response to  
623 personally familiar faces in autism: Findings of fusiform activity and beyond.  
624 *Brain*, 127, 2703–2716. DOI: 10.1093/brain/awh289.
- 625 Rüsçh, N., Bado, P., Zahn, R., Bramati, I. E., De Oliveira-Souza, R., & Moll, J. (2014).  
626 You and your kin: Neural signatures of family-based group perception in the  
627 subgenual cortex. *Social Neuroscience*, 9, 326-331. doi:  
628 10.1080/17470919.2014.912676.
- 629 Samson, D., Apperly, I. A., Chiavarino, C., & Humphreys, G. W. (2004). Left  
630 temporoparietal junction is necessary for representing someone else's belief.  
631 *Nature Neuroscience*, 7, 499 – 500. doi: 10.1038/nn1223.
- 632 Satpute, A.B., Badre, D., & Ochsner, K.N. (2014). Distinct regions of prefrontal cortex  
633 are associated with the controlled retrieval and selection of social information.  
634 *Cerebral Cortex*, 24, 1269-1277. doi: 10.1093/cercor/bhs408.

- 635 Saxe, R. & Kanwisher, N. (2003). People thinking about people: The role of the  
636 temporo-parietal junction in “theory of mind”. *NeuroImage*, *19*, 1835-1842.
- 637 Seyfarth, R. M. & Cheney, D. L. (2015). Social cognition. *Animal Behaviour*, *103*, 191-  
638 202. doi: <http://dx.doi.org/10.1016/j.anbehav.2015.01.030>
- 639 Shkurko, A. V. (2013). Is social categorization based on relational ingroup/outgroup  
640 opposition? A meta-analysis. *Social Cognitive and Affective Neuroscience*, *8*,  
641 870-877. doi: 10.1093/scan/nss085.
- 642 Stein, T., Moritz, C., Quigley, M., Cordes, D., Haughton, V., & Meyerand, E. (2000).  
643 Functional connectivity in the thalamus and hippocampus studied with functional  
644 MR imaging. *American Journal of Neuroradiology*, *21*, 1397-1401.
- 645 Sugiura, M., Kawashima, R., Nakamura, K., Sato, N., Nakamura, A., Kato, T., Hatano,  
646 K., Schormann, T., Zilles, K., Sato, K., Ito, K., & Fukuda, H. (2001). Activation  
647 reduction in anterior temporal cortices during repeated recognition of faces of  
648 personal acquaintances. *NeuroImage*, *13*, 877–890. doi:  
649 10.1006/nimg.2001.0747.
- 650 Tendler, A. & Wagner, S. (2015). Different types of theta rhythmicity are induced by  
651 social and fearful stimuli in a network associated with social memory. *eLife*, *4*,  
652 e03614. doi: 10.7554/eLife.03614.
- 653 Tung, J., Barreiro, L. B., Burns, M. B., Grenier, J. C., Lynch, J., Greineisen, L. E.,  
654 Altmann, J., Alberts, S. C., Blekhman, R. K., & Archie, E. A. (2015). Social  
655 networks predict gut microbiome composition in wild baboons. *eLife*, *4*, e05224.  
656 doi: 10.7554/eLife.05224

- 657 Van Bavel, J. J. & Cunningham, W. A. (2012). A social identity approach to person  
658 memory: Group membership, collective identification, and social role shape  
659 attention and memory. *Personality and Social Psychology Bulletin*, *38*, 1566-  
660 1578.
- 661 Van Essen, D. C. (2005). A population-average, landmark- and surface-based (PALS)  
662 atlas of human cerebral cortex. *NeuroImage*, *28*, 635-662. doi:  
663 10.1016/j.neuroimage.2005.06.058.
- 664 Wang, Y., Collins, J. A., Koski, J., Nugiel, T., Metoki, A., & Olson, I. R. (2017). Dynamic  
665 neural architecture for social knowledge retrieval. *Proceedings of the National  
666 Academy of Sciences*, *114*, E3305–E3314. doi: 10.1073/pnas.1621234114.
- 667 Wlodarski, R. & Dunbar, R. I. M. (2016). When BOLD is thicker than water: Processing  
668 social information about kin and friends at different levels of the social network.  
669 *Social Cognitive and Affective Neuroscience*, *11*, 1952-1960. doi:  
670 10.1093/scan/nsw101.
- 671 Zerubavel, N., Bearman, P. S., Weber, J., & Ochsner, K. N. (2015). Neural mechanisms  
672 tracking popularity in real-world social networks. *Proceedings of the National  
673 Academy of Sciences*, *112*, 15072-15077. doi: 10.1073/pnas.1511477112.
- 674 Zink, C. F., Kempf, L., Hakimi, S., Rainey, C. A., Stein, J. L., & Meyer-Lindenberg, A.  
675 (2011). Vasopressin modulates social recognition-related activity in the left  
676 temporoparietal junction in humans. *Translational Psychiatry*, *1*, e3. doi:  
677 10.1038/tp.2011.2.
- 678
- 679

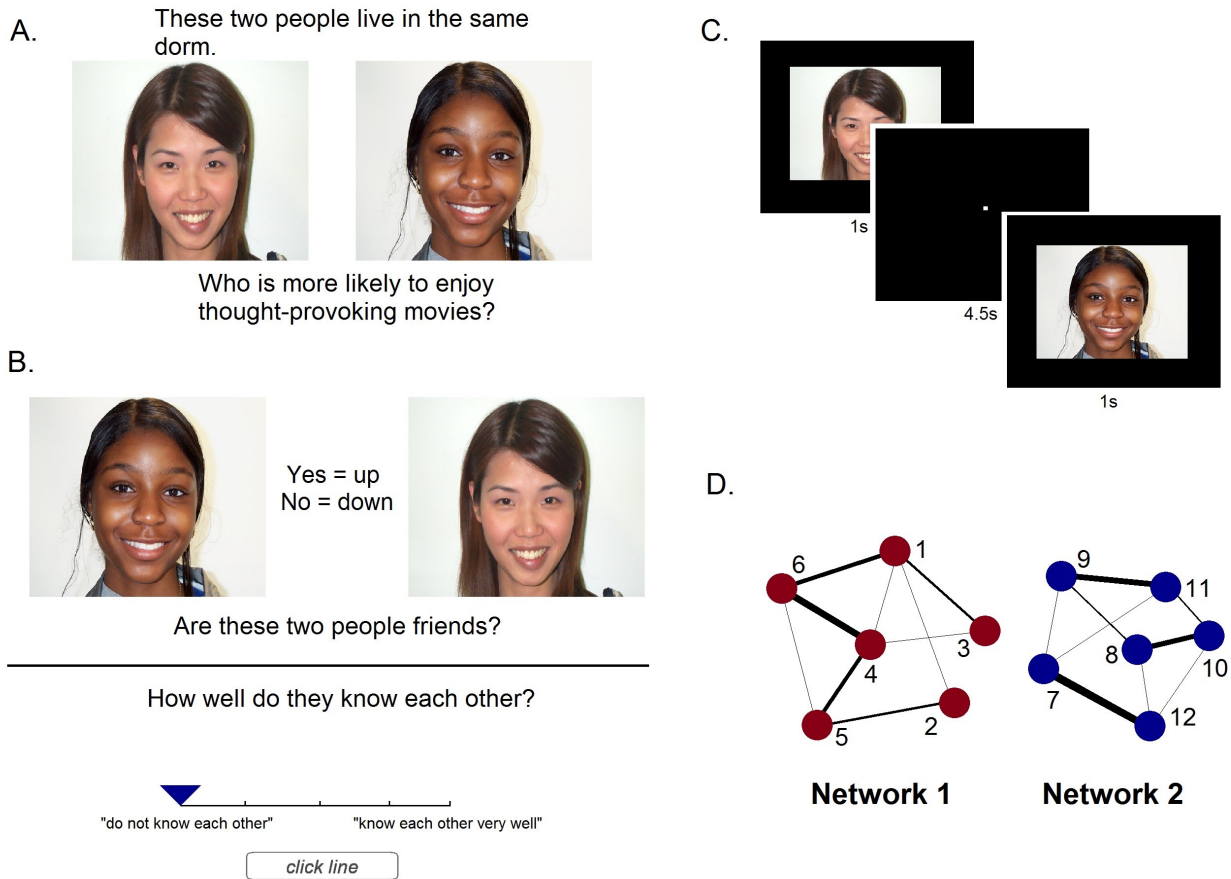

680

681

682 **Figure 1.** A. Example trial of the paired presentation of a social network tie, where subjects  
683 were asked to judge between the two faces on an unrelated characteristic. B. Example trial of  
684 the recall task, where subjects were asked to report whether a pair of faces was connected, and  
685 how well they know each other (0-4 scale). C. fMRI task, where each face was presented  
686 individually for 1 second (4.5 second inter-stimulus interval). D. Structure of the two social  
687 networks. Each node represents a different face and line thickness represents connection  
688 strength. All ties are non-directed (reciprocal).

689

690

691

692

693

694

695

|                                 | <b>Network 1</b> | <b>Network 2</b> | <b>Both Networks</b> | <b>t-value (p)</b>  |
|---------------------------------|------------------|------------------|----------------------|---------------------|
| <b>Hit Rate</b>                 | <b>0.82</b>      | <b>0.83</b>      | <b>0.83</b>          | <b>-0.13 (0.89)</b> |
| <i>SD</i>                       | <i>0.14</i>      | <i>0.11</i>      | <i>0.09</i>          |                     |
| <b>False Alarm Rate</b>         | <b>0.39</b>      | <b>0.47</b>      | <b>0.43</b>          | <b>-1.23 (0.23)</b> |
| <i>SD</i>                       | <i>0.21</i>      | <i>0.24</i>      | <i>0.19</i>          |                     |
| <b>d'</b>                       | <b>1.3</b>       | <b>1.2</b>       | <b>1.2</b>           | <b>0.70 (0.49)</b>  |
| <i>SD</i>                       | <i>0.71</i>      | <i>0.86</i>      | <i>0.6</i>           |                     |
| <b>Strength Correlation (r)</b> | <b>0.58</b>      | <b>0.53</b>      | <b>0.54</b>          | <b>0.82 (0.42)</b>  |
| <i>SD</i>                       | <i>0.25</i>      | <i>0.21</i>      | <i>0.21</i>          |                     |

696

697 **Table 1.** Accuracy of recalling network relationships after incidental learning. Hit rate, false  
698 alarm rate, and d' represent the accuracy of recalling the true connections within the networks.  
699 Strength correlation refers to the correlation between the matrix of true relationship strength of  
700 the faces in the networks and the behavioral judgments of strength, and is therefore a measure  
701 of accuracy of recalling relationship strength. T-values and p-values for paired sample two-tailed  
702 t-tests between the two networks are reported at the right of the table. Bold indicates primary  
703 data, and italics indicate the standard deviation of the data.

704

705

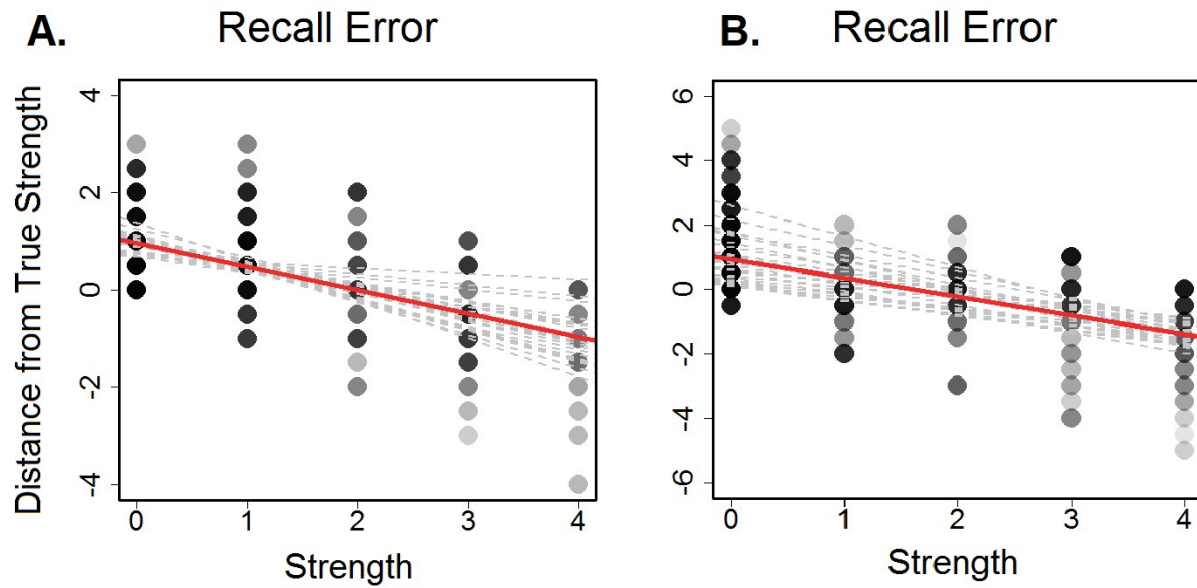

706

707

708 **Figure 2.** A. Each subject's error by pair strength level (0 = unconnected, 4 = close friends) from  
709 the primary dataset. Positive values = overestimation of strength and negative values =  
710 underestimation of strength. Gray lines show individual subject regression lines. The red line  
711 shows the group regression line. B. Subject error by pair strength level (0 = unconnected, 6 =  
712 close friends) from the secondary dataset with a larger social network (N = 9). Positive values =  
713 overestimation of strength and negative values = underestimation of strength. Gray lines show  
714 individual subject regression lines. The red line shows the group regression line.

715



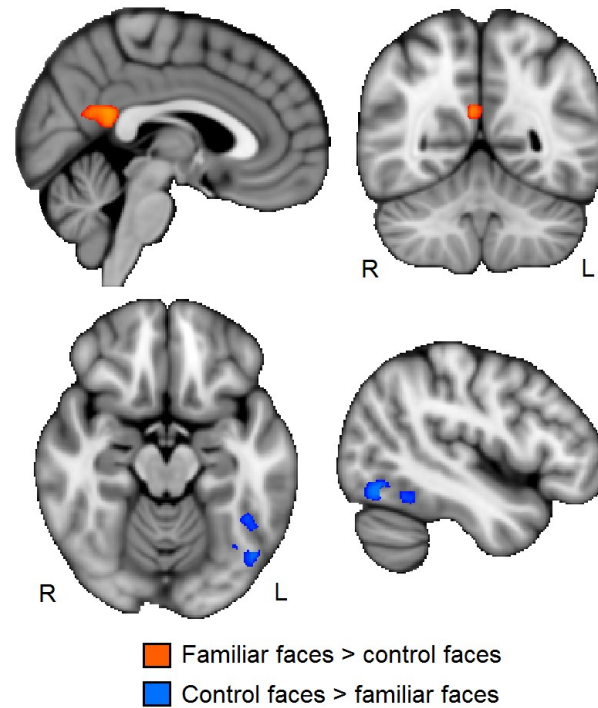

| Cluster                              | Peak Value (t) | Voxels | x   | y   | z   |
|--------------------------------------|----------------|--------|-----|-----|-----|
| <b>Familiar &gt; Control</b>         |                |        |     |     |     |
| <i>Posterior cingulate/precuneus</i> | 4.44           | 152    | 6   | -48 | 20  |
| <i>Posterior cingulate/precuneus</i> | 3.62           | 7      | 2   | -36 | 30  |
| <i>Posterior cingulate/precuneus</i> | 3.37           | 6      | -4  | -60 | 32  |
| <b>Control &gt; Familiar</b>         |                |        |     |     |     |
| <i>L fusiform gyrus</i>              | 4.01           | 248    | -44 | -68 | -14 |
| <i>L fusiform gyrus</i>              | 4.11           | 30     | -38 | -90 | -8  |
| <i>L fusiform gyrus</i>              | 4.19           | 11     | -24 | -30 | -26 |

736

737 **Table 2.** Coordinates, cluster size, and peak activity for the group-level clusters from the  
 738 univariate familiar vs. control face analysis.

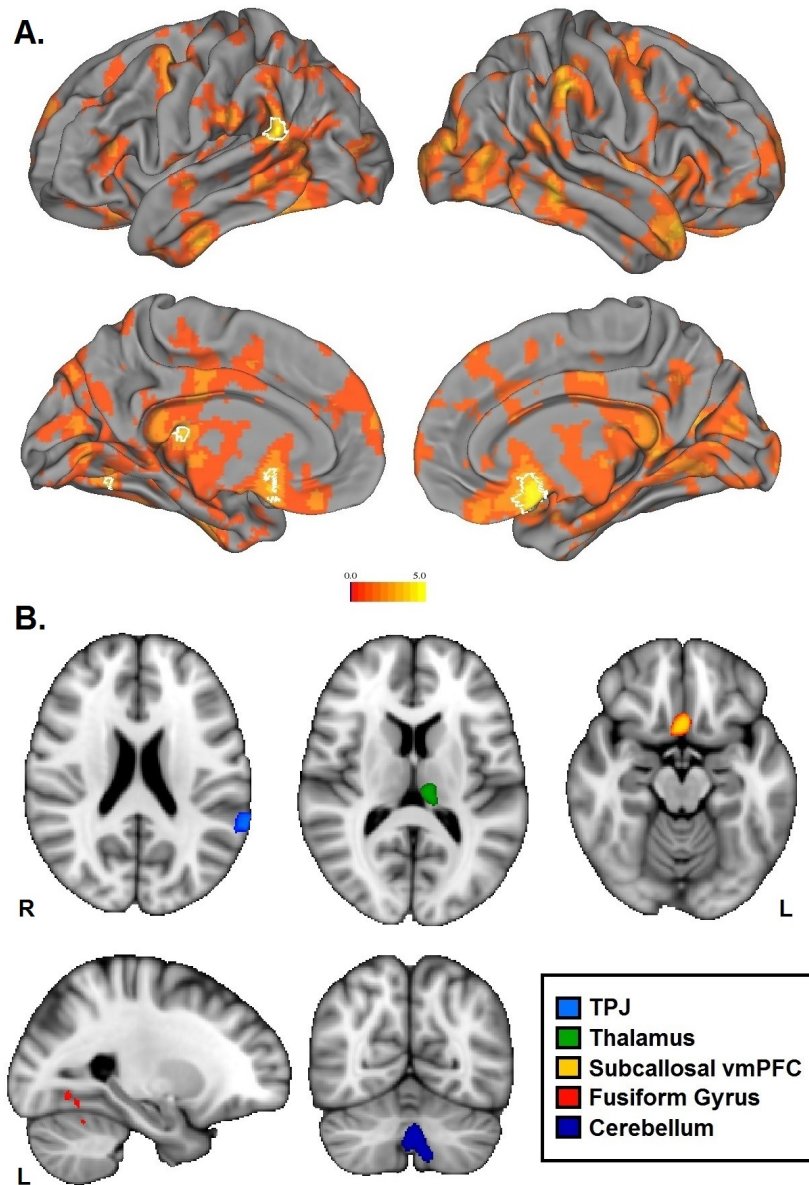

739

740

741 **Figure 4.** Results from group-level nonparametric 1-sample t-test on the correlation maps from

742 RSA searchlight on the recall accuracy model. A. t-statistic map of all positive t-values projected

743 onto the surface, where white borders delineate significant clusters from the group analysis ( $p <$

744  $0.05$ , FWE-corrected with threshold-free cluster enhancement). B. The same significant clusters

745 projected in the volume.

746

747

748

| <b>Cluster</b>           | <b>Peak Value (t)</b> | <b>Voxels</b> | <b>x</b> | <b>y</b> | <b>z</b> |
|--------------------------|-----------------------|---------------|----------|----------|----------|
| <b>Cerebellum</b>        | 3.92                  | 730           | 0        | -64      | -38      |
| <b>Subcallosal vmPFC</b> | 5.6                   | 274           | 2        | 14       | -16      |
| <b>Thalamus</b>          | 4.14                  | 132           | -10      | -28      | 10       |
| <b>TPJ</b>               | 4.31                  | 117           | -64      | -48      | 18       |
| <b>Fusiform Gyrus</b>    | 3.28                  | 11            | -26      | -60      | -12      |
| <b>Fusiform Gyrus</b>    | 3.5                   | 5             | -24      | -66      | -8       |
| <b>Fusiform Gyrus</b>    | 3.37                  | 5             | -26      | -56      | 26       |
| <b>Lateral Occipital</b> | 3.65                  | 3             | -52      | -56      | 2        |
| <b>Lateral Occipital</b> | 3.66                  | 3             | -56      | -70      | -2       |

749

750 **Table 3.** Coordinates, cluster size, and peak activity for the group-level significant clusters from  
751 the recall error model.

752

753

754

755

756

757

758

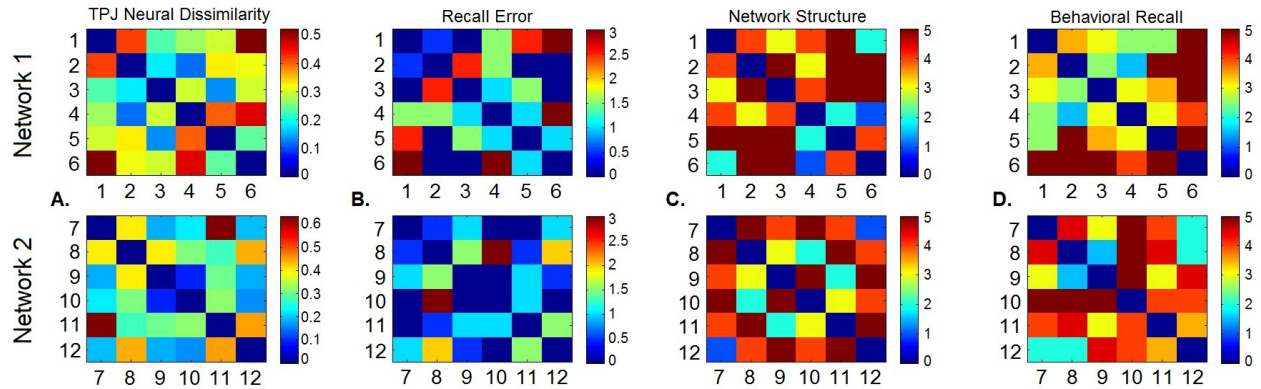

759

760

761 **Figure 5.** Dissimilarity matrices between face pairs for a sample subject. A. Neural dissimilarity

762 in an example region in the temporoparietal junction. B. Recall error DM (0 = perfectly accurate

763 recall). C. True network structure DM (0 = unconnected). D. Behavioral recall of face pair

764 strength (0 = unconnected).

765
